# Supplementary material for: Tumor RNA transfected DCs derived from iPS cells elicit cytotoxicity against cancer cells induced from colorectal cancer patients in vitro
Source: PubMed Central journal article supplement (PMC8885822; doi:10.1038/s41598-022-07305-1), 2022-02-28

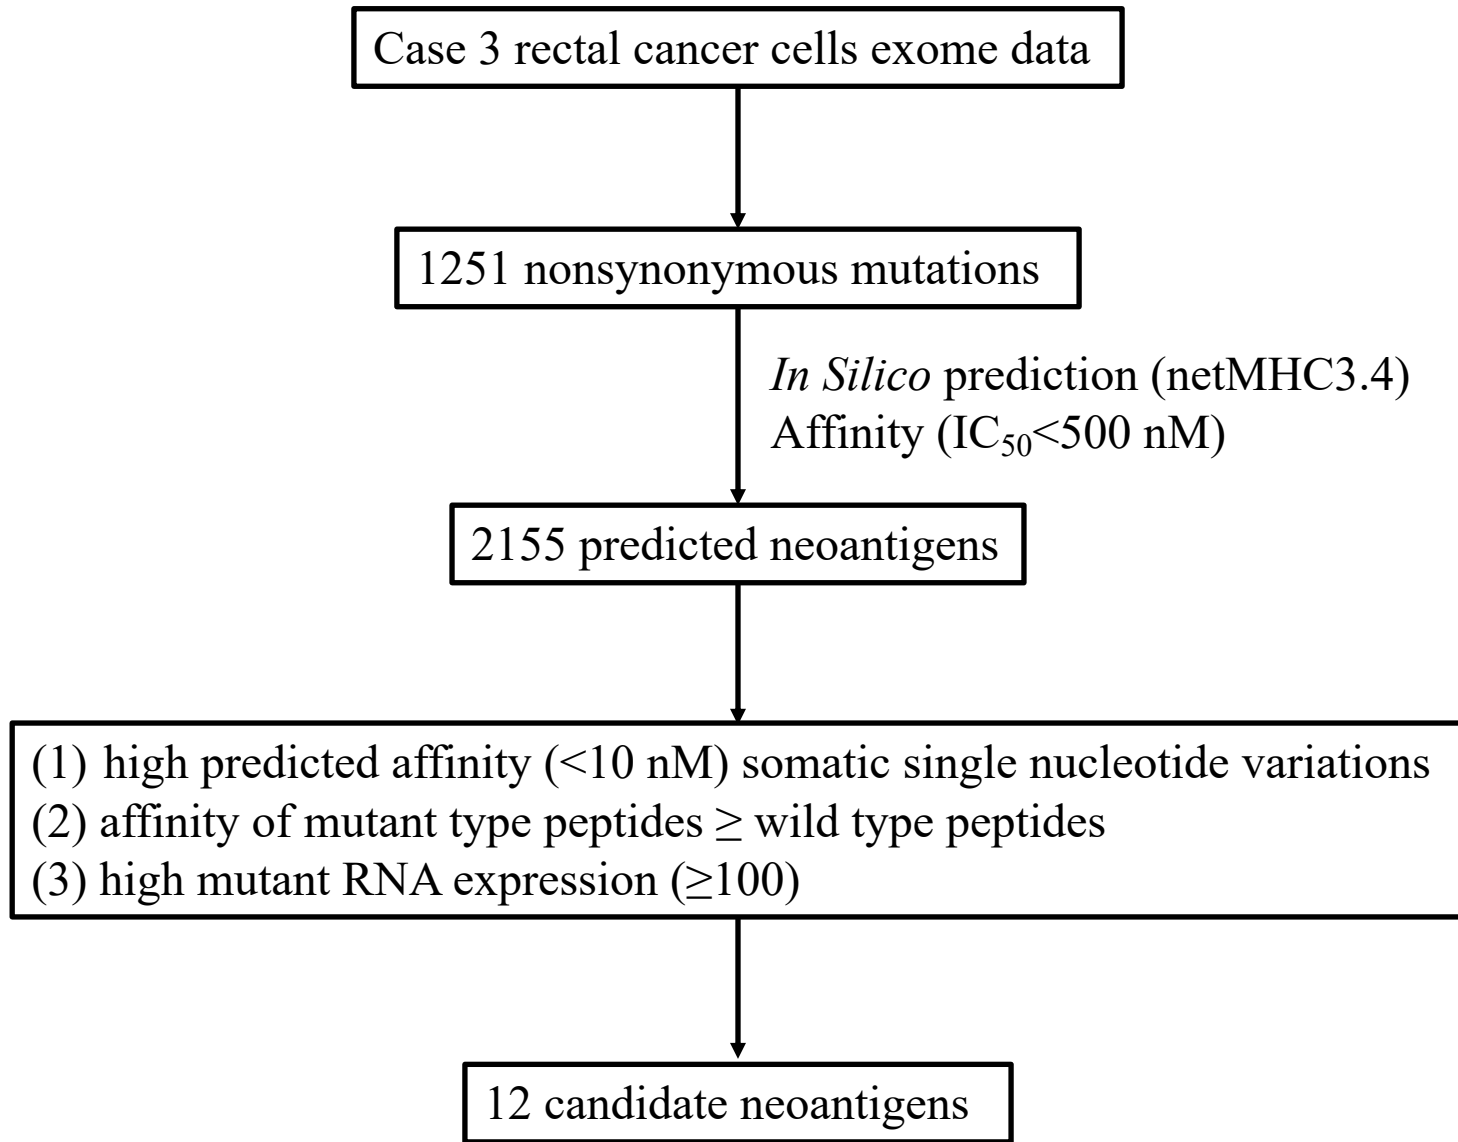

Supplement: 41598_2022_7305_MOESM6_ESM.pdf [file 41598_2022_7305_MOESM6_ESM.pdf]
